# Supplementary material for: Adaptation aftereffects reveal representations for encoding of contingent social actions
Source: PubMed Central journal article supplement — Proc Natl Acad Sci U S A. 2018 Jul 2;115(29):7515–20. doi: 10.1073/pnas.1801364115 (PMC6055179; doi:10.1073/pnas.1801364115), 2018-07-02
Supplement: pnas.1801364115.sapp.pdf [file pnas.1801364115.sapp.pdf]

## Supplementary Information for

“Adaptation aftereffects reveal representations for encoding of contingent social actions”

Leonid A Fedorov, Dong-Seon Chang, Martin A Giese, Heinrich H .Bülthoff and Stephan de la Rosa

Stephan de la Rosa

Email: [delarosa@tuebingen.mpg.de](mailto:delarosa@tuebingen.mpg.de)

### **This PDF file includes:**

Figs. S1  
Captions for movies S1 to S8

### **Other supplementary materials for this manuscript include the following:**

Movies S1 to S8

**Fig. S1.** Distributions of participants responses to the questionnaire that asked to describe (label) the action stimuli used in Experiment 4 ('hug', 'push', 'hand-left', 'hand-right' and their scrambled counterparts).

non-scrambled push

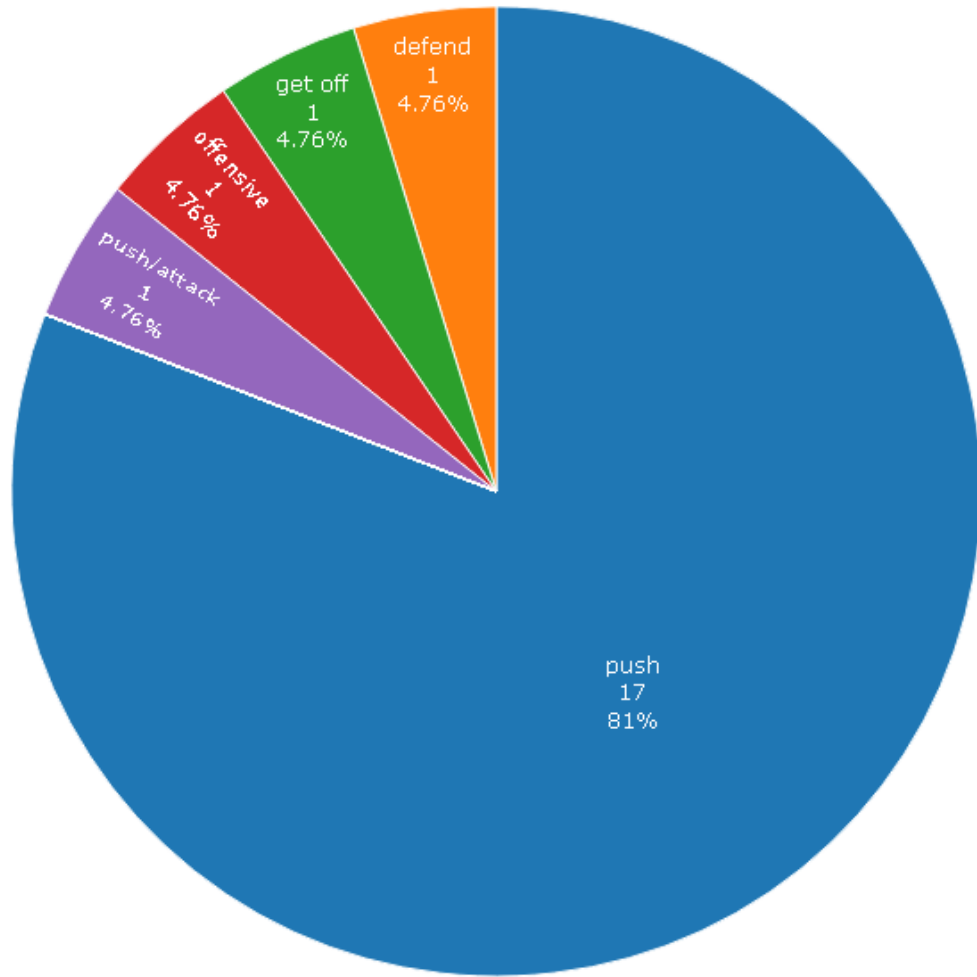

scrambled push

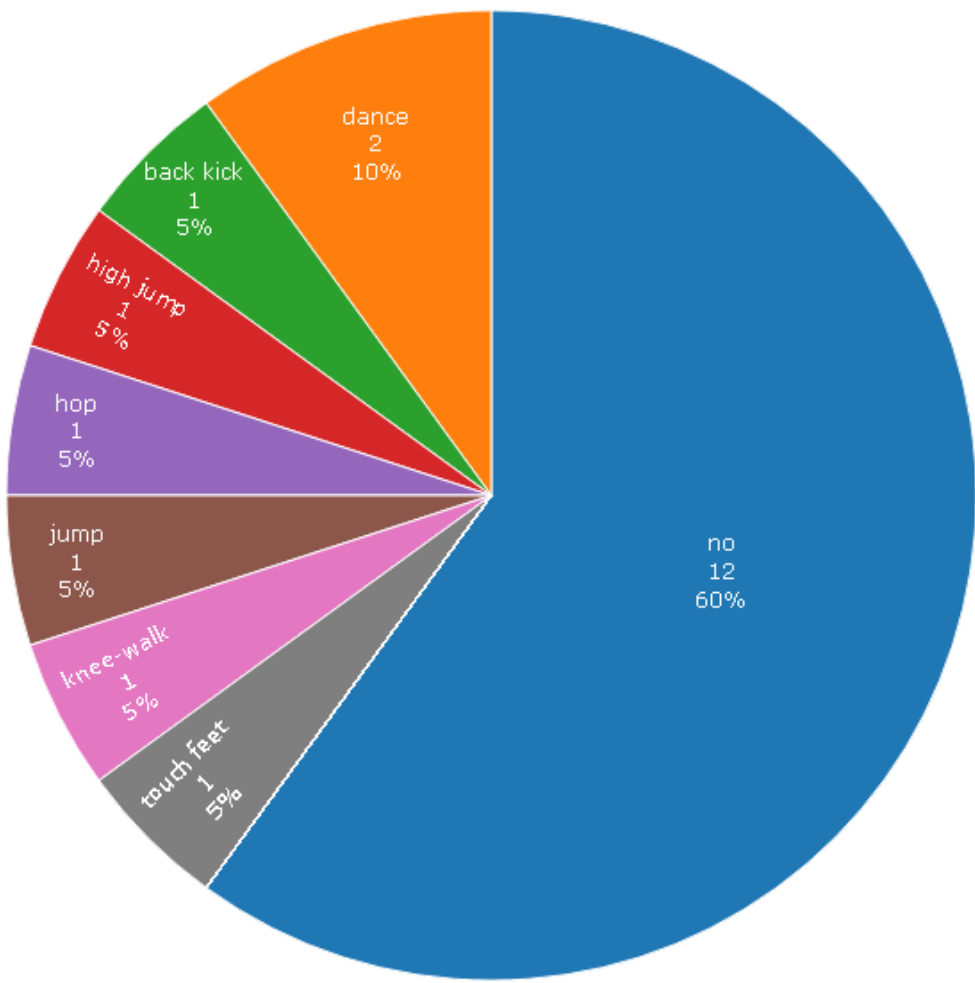

non-scrambled hug

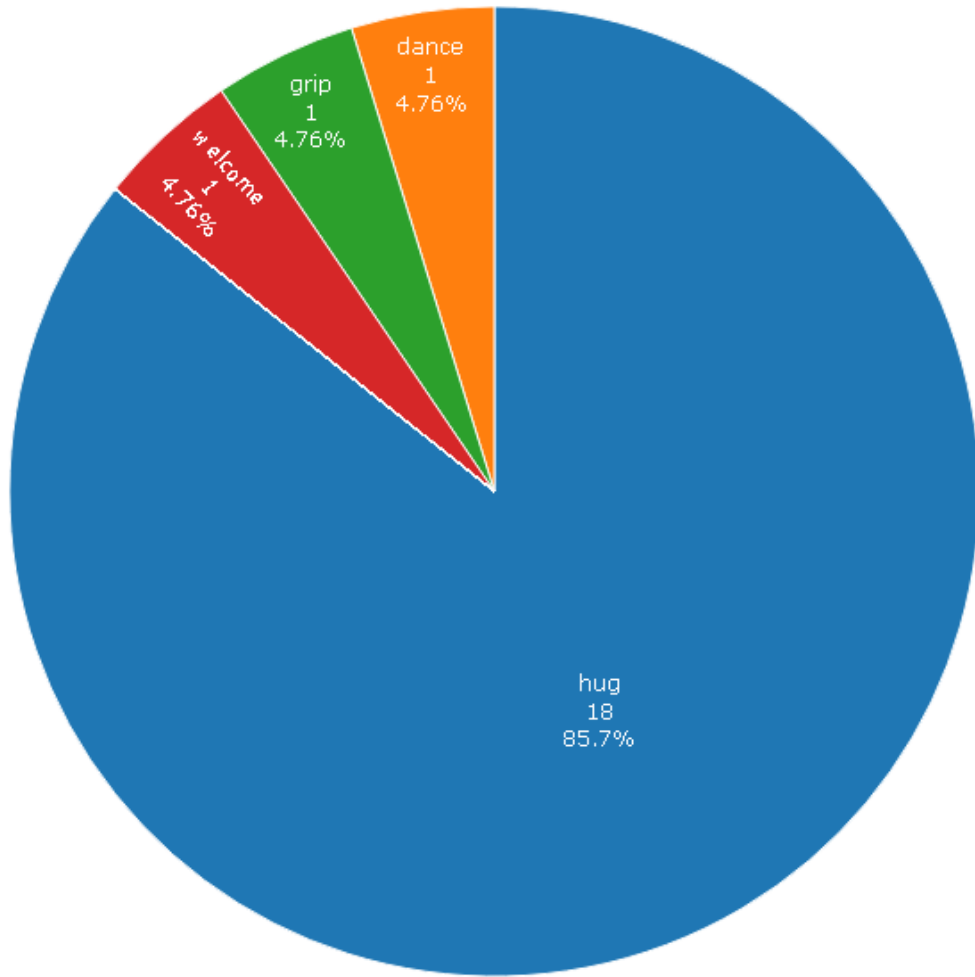

scrambled hug

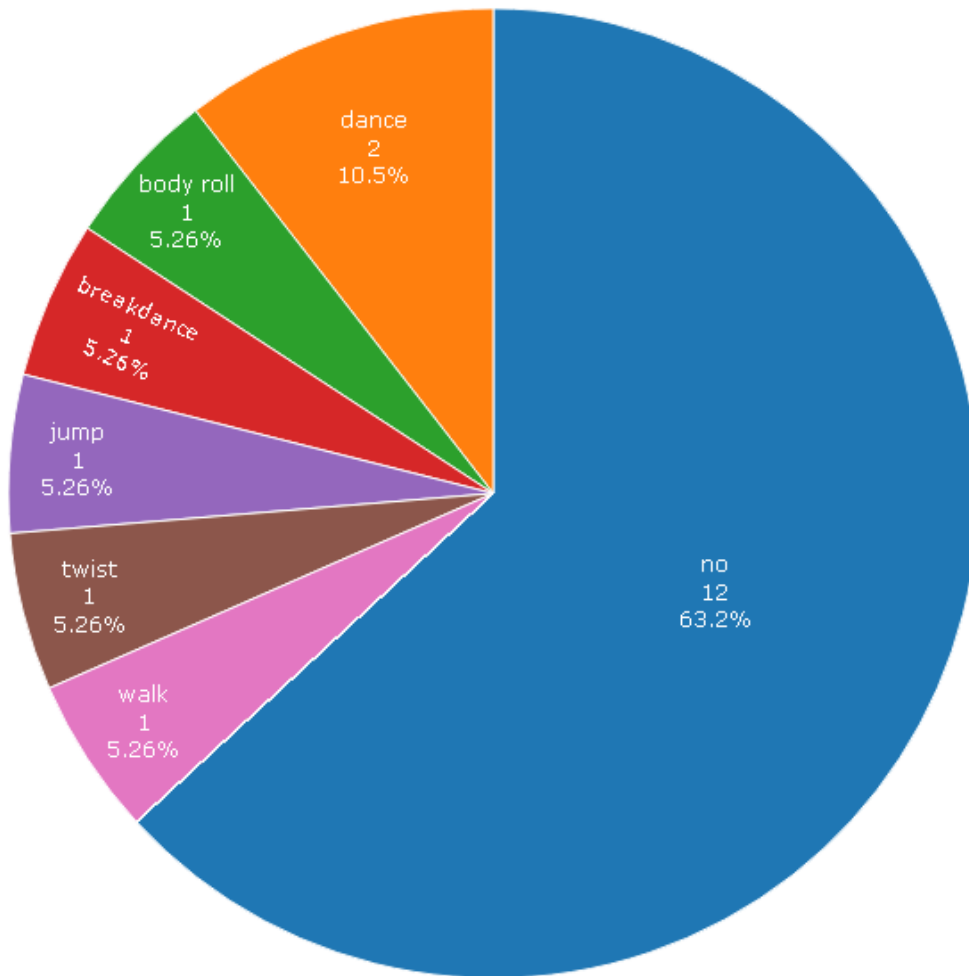

### non-scrambled hand-up

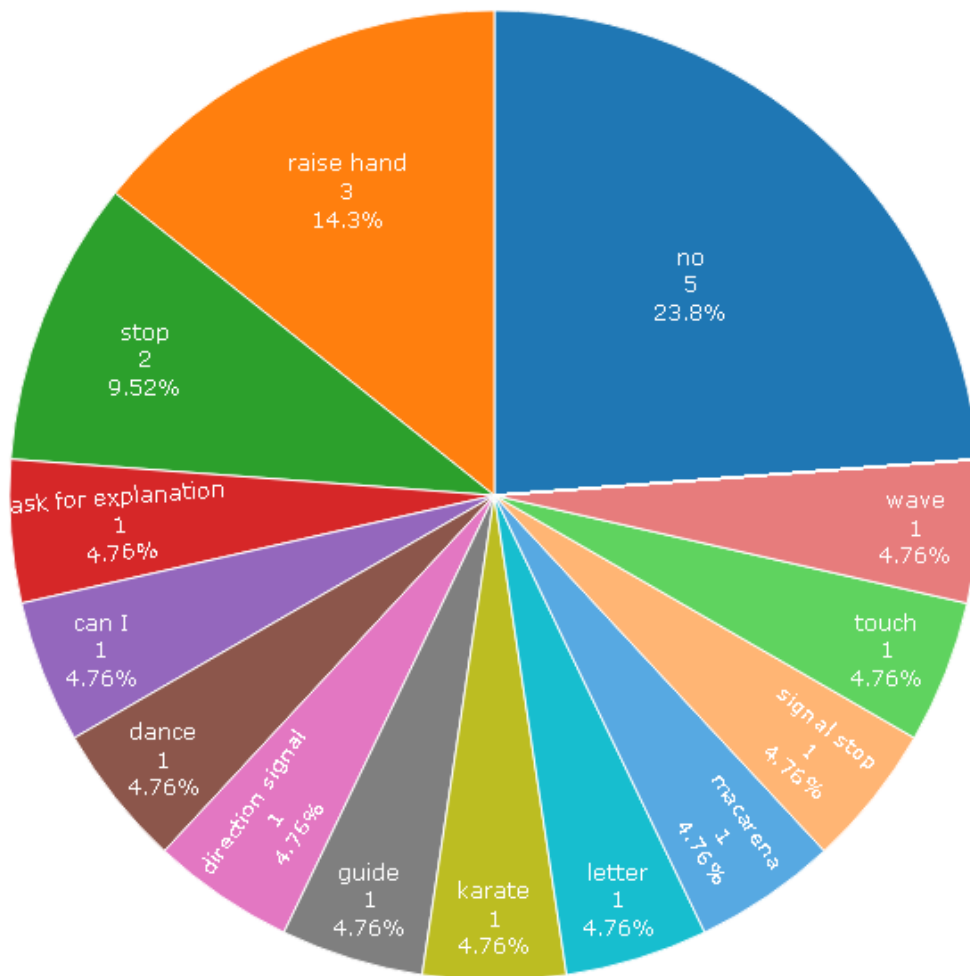

scrambled hand-up

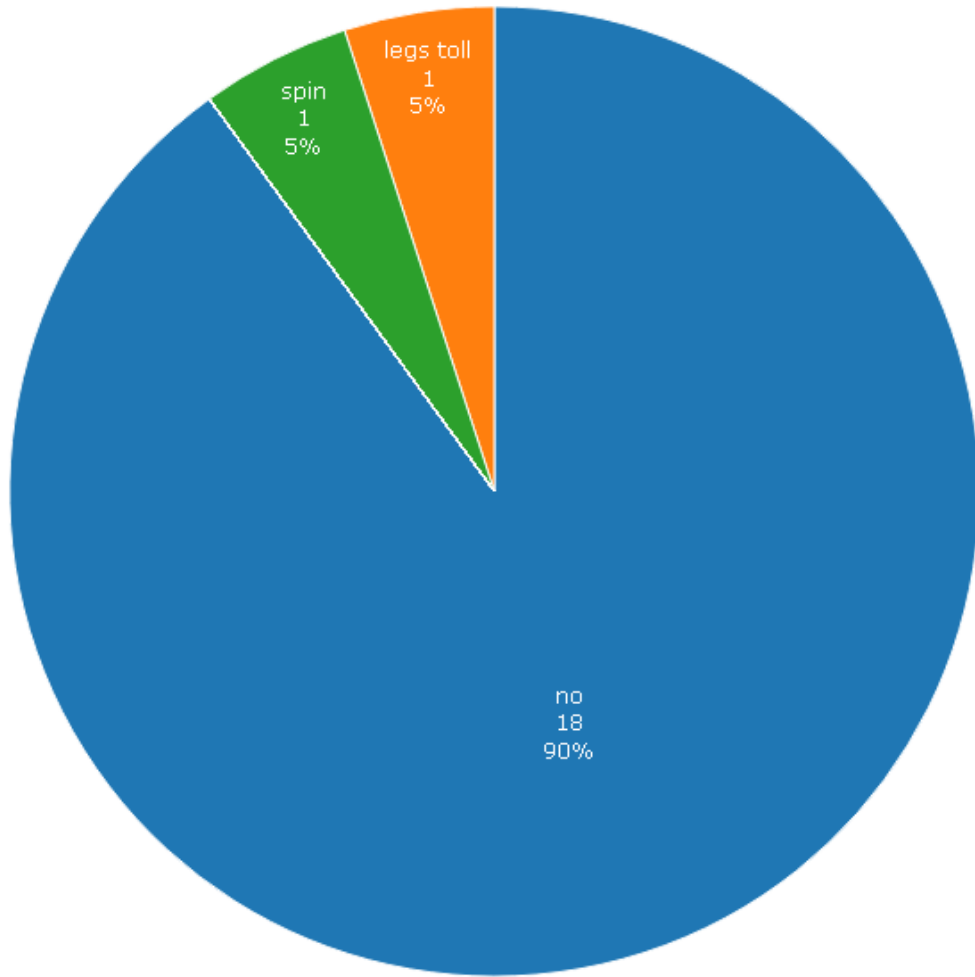



non-scrambled hand-left

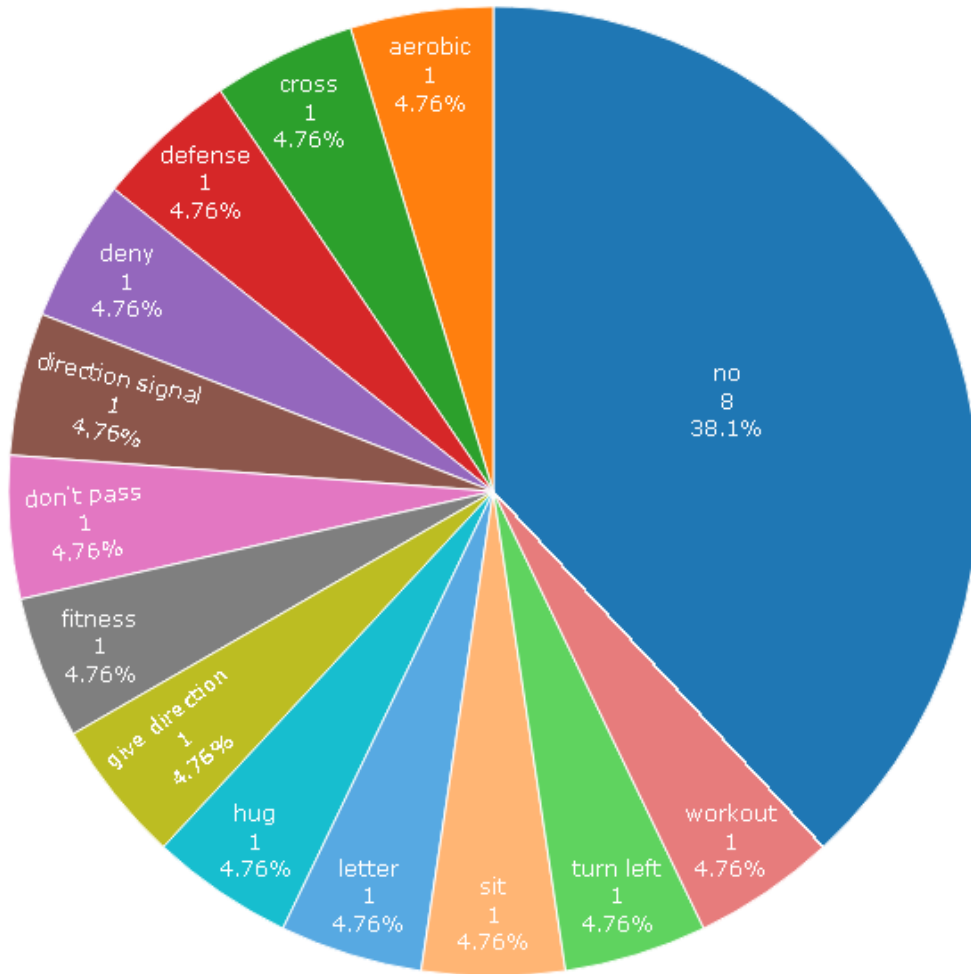

scrambled hand-left

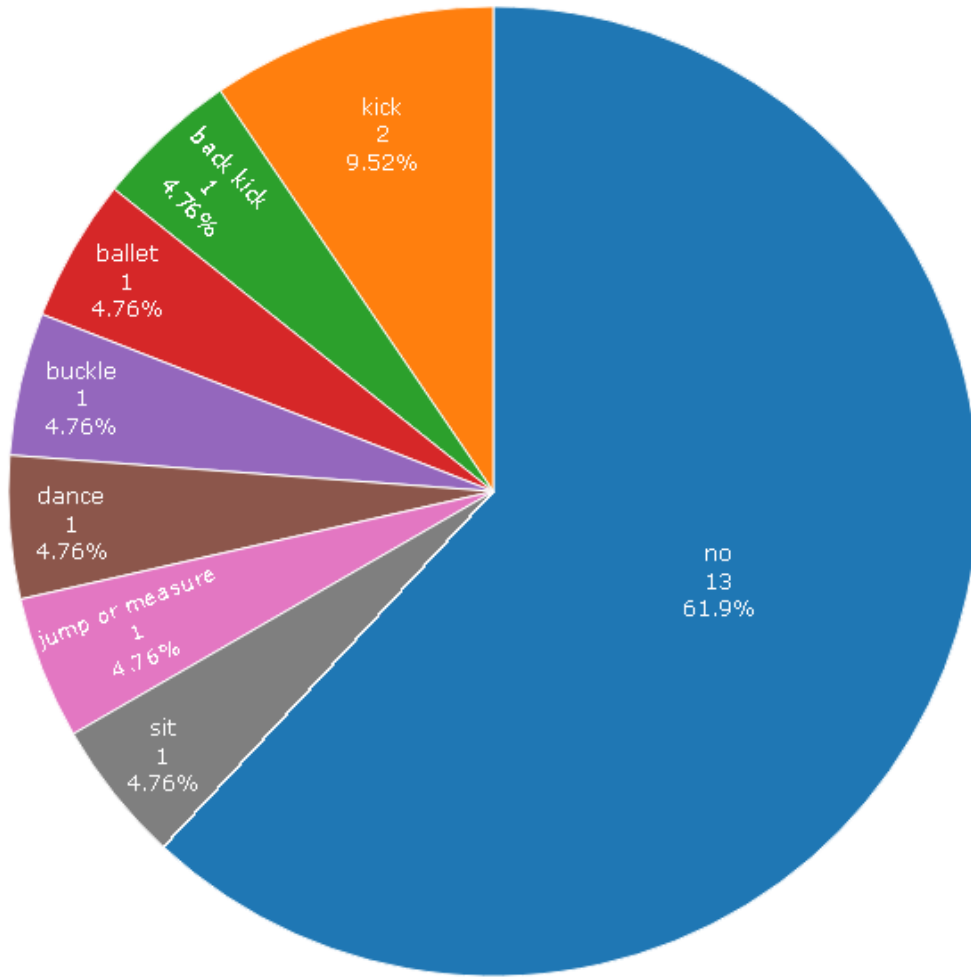

**Movie S1. Demonstration of a sequence of action avatars, starting from an unmorphed ‘catching’ action, and with each consecutive one being morphed with a ‘taking’ action to a larger degree than a previous one, and ending with the unmorphed ‘taking’ action. Unmorphed ‘catching’ and ‘taking’ avatars were used as two of the four adaptor stimuli in Experiment 1. One of the morphed avatars (the one determined to be equally likely perceived as ‘catching’ or ‘taking’ for each participant individually) was used as a test stimulus.**

**Movie S2. Demonstration of a sequence of action avatars, starting from an unmorphed ‘throwing’ action, and with each consecutive one being morphed with a ‘giving’ action to a larger degree than a previous one, and ending with the unmorphed ‘giving’ action. Unmorphed ‘throwing’ and ‘giving’ avatars were used as two of the four adaptor stimuli in Experiment 1. One of the morphed avatars (the one determined to be equally likely perceived as ‘throwing’ or ‘giving’ for each participant individually) was used as a test stimulus.**

**Movie S3. Demonstration of (stick-figure) avatars with scrambled joint positions that were used as control adaptor stimuli in Experiment 2. The movie shows three repetitions of each of the four scrambled avatars (‘throwing’, ‘giving’, ‘taking’, ‘catching’).**

**Movie S4. Demonstration of (stick-figure) avatars from ‘salsa dancing’ social interaction that were used as control adaptor stimuli in Experiment 3. The movie shows three repetitions of each of the two avatars (‘salsa follower’, ‘salsa leader’).**

**Movie S5. Demonstration of (stick-figure) avatar performing the ‘push’ action.**

**Movie S6. Demonstration of (stick-figure) avatar performing the ‘hug’ action.**

**Movie S7. Demonstration of (stick-figure) avatar performing the ‘hand-up’ action.**

**Movie S8. Demonstration of (stick-figure) avatar performing the ‘hand-left’ action.**
